# Supplementary material
Source: PubMed Central journal article supplement (PMC2755080)
Supplement: NIHMS132598-supplement-1_si_001.pdf [file NIHMS132598-supplement-1_si_001.pdf]

**Imino-Oxy Acetic Acid Dealkylation as Evidence for an Inner-Sphere Alcohol  
Intermediate in the Reaction Catalyzed by Peptidylglycine  $\alpha$ -Hydroxylating  
Monoxygenase (PHM).**

**Supporting Information**

Neil R. McIntyre,<sup>†</sup> Edward W. Lowe, Jr.<sup>#</sup>, and David J. Merkler\*

Department of Chemistry, University of South Florida, 4202 E. Fowler Ave.,  
Tampa, FL 33620, USA

\*Corresponding author. E-mail: merkler@cas.usf.edu

<sup>†</sup>Present address: Department of Molecular Medicine, College of Medicine, University of  
South Florida, 12901 Bruce B. Downs Blvd., Tampa, FL, 33612-4799

<sup>#</sup>Present address: Vanderbilt University Center for Structural Biology, 465 21st Ave.  
South  
BIOSCI/MRBIII, Room 5144F, Nashville, TN 37232-8725

## Supporting Information Available

**Figure A.** C<sub>18</sub>-reverse phase high performance liquid chromatograph of (R/S)- $\alpha$ -hydroxy-*N*-benzoylglycine, *N*-benzoylglycine, benzamide, benzaldehyde imino-oxy acetic acid, and benzaldoxime using 65% 50 mM K<sub>x</sub>PO<sub>4</sub>(pH 6.0), 30% MeOH, and 5% CH<sub>3</sub>CN flowing at a rate of 1mL/min, with signal detection at 248 nm.

**Figure B.** <sup>13</sup>C NMR analysis of PAM mediated benzaldehyde imino-oxy acetic acid catalysis. The isolated sample was analyzed with a Varian 100-MHz instrument using (*d*<sub>3</sub>)-methanol as the solvent.

**Figure C and Table C.** Stoichiometry of the enzymatic [oxygen] versus [substrate] consumption measured below the ambient concentration of dissolved oxygen (217 $\mu$ M). Benzaldehyde imino-oxy acetic acid was used in this experiment as the substrate.

**Figure D.** Replot analysis of data represented in table B for the  $D(V_{MAX}/K_M)_{BIAA}$ .

**Figure E.** Replot analysis of data represented in table A for the  $D(V_{MAX}/K_M)_{BIAA}$  as [O<sub>2</sub>] $\rightarrow$ 0 $\mu$ M and  $D(V_{MAX}/K_M)_{BIAA}$  as [O<sub>2</sub>] $\rightarrow\infty$ , respectively.

**Scheme A.** Spectrophotometric glyoxylate analysis used in tandem with C<sub>18</sub> RP-HPLC for the determination and dilution benzaldoxime (BOX) concentration to 48  $\mu$ M, respectively.

**Scheme B.** Cu<sub>M</sub> domain for the PHM active site poses for benzaldehyde imino-oxy acetic acid C $\alpha$ -radical for the reaction coordinate corresponding to figure 5, respectively. Yellow encased coordinate represents the energetic maxima. Atomic representations are carbon (grey), nitrogen (blue), sulfur (yellow), oxygen (red), and hydrogen (white). Please note, the yellow bordered box represents the energetic maxima for the reaction coordinate.

**Scheme C.** PHM active site poses for benzaldehyde imino-oxy acetic acid C $\alpha$ -radical for the reaction coordinate corresponding to figure 6, respectively. The yellow coordinate represents the energetic maximum. Atomic representations are carbon (grey), nitrogen (blue), sulfur (yellow), oxygen (red), and hydrogen (white). Please note, the yellow bordered box represents the energetic maximum in the reaction coordinate.

**Table A.** Kinetic parameters for data in supporting information figures 7 and 8, respectively.

**Table B.** Kinetic parameters for oxygen variation with benzaldehyde imino-oxy acetic

**Movie A.** Cu<sup>II</sup>-OH reaction coordinate for BIAA oxidation.

**Movie B.** Cu<sup>II</sup>-O $\cdot$  reaction coordinate for BIAA oxidation.

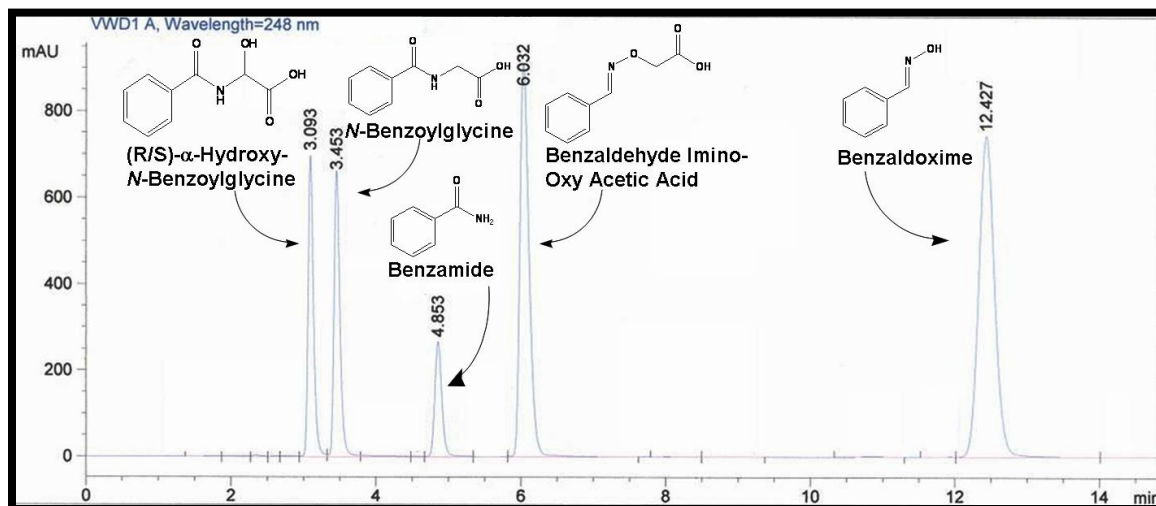

Figure A.

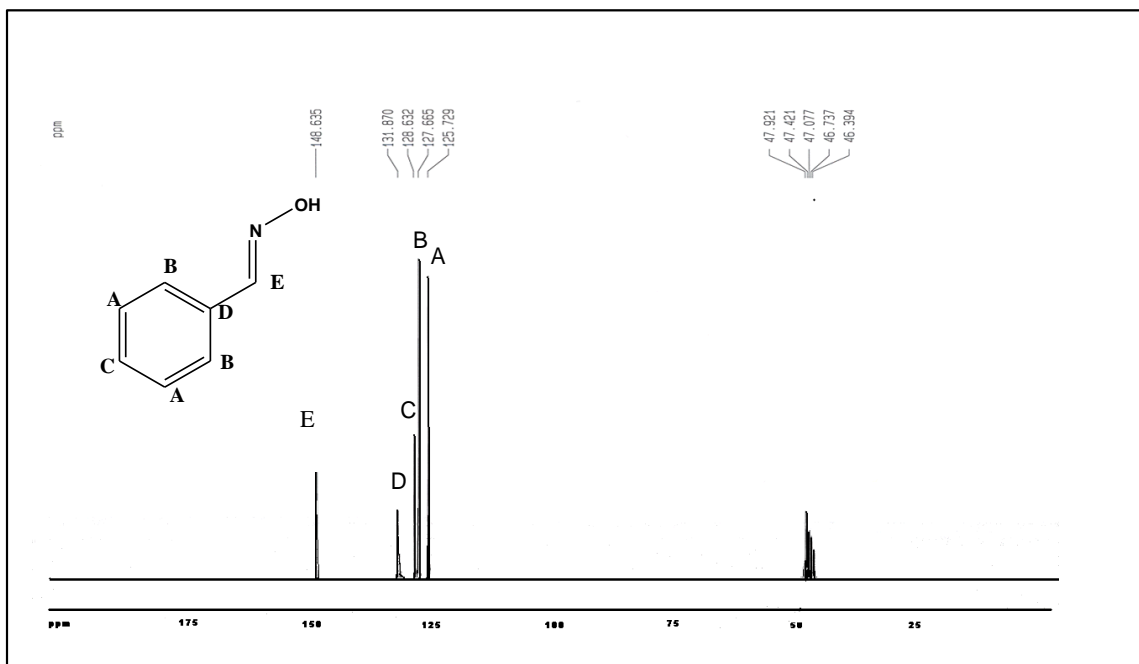

Figure B.

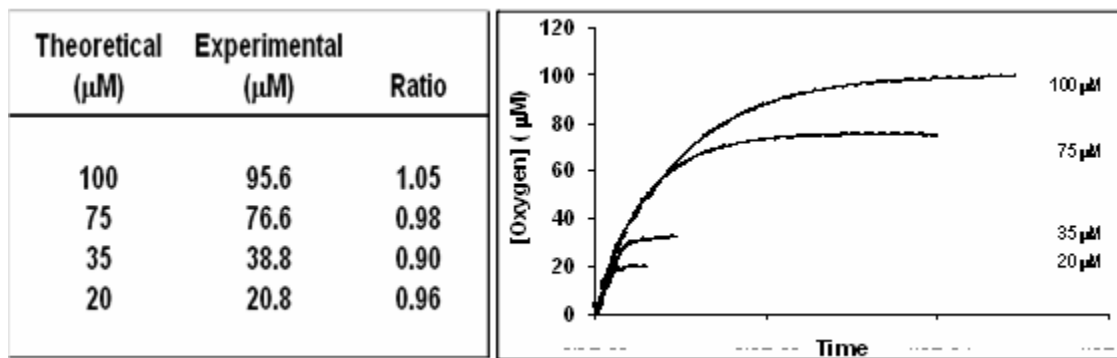

Figure C and Table C.

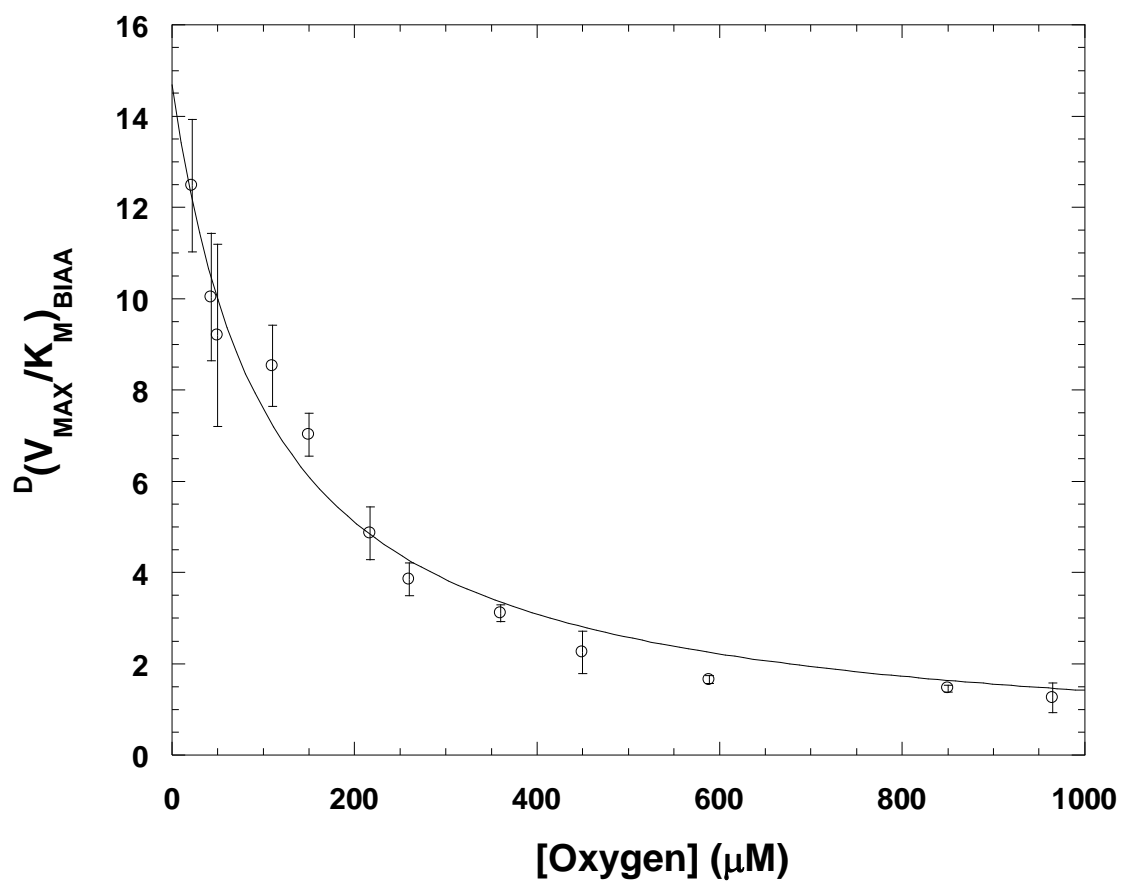

Figure D.

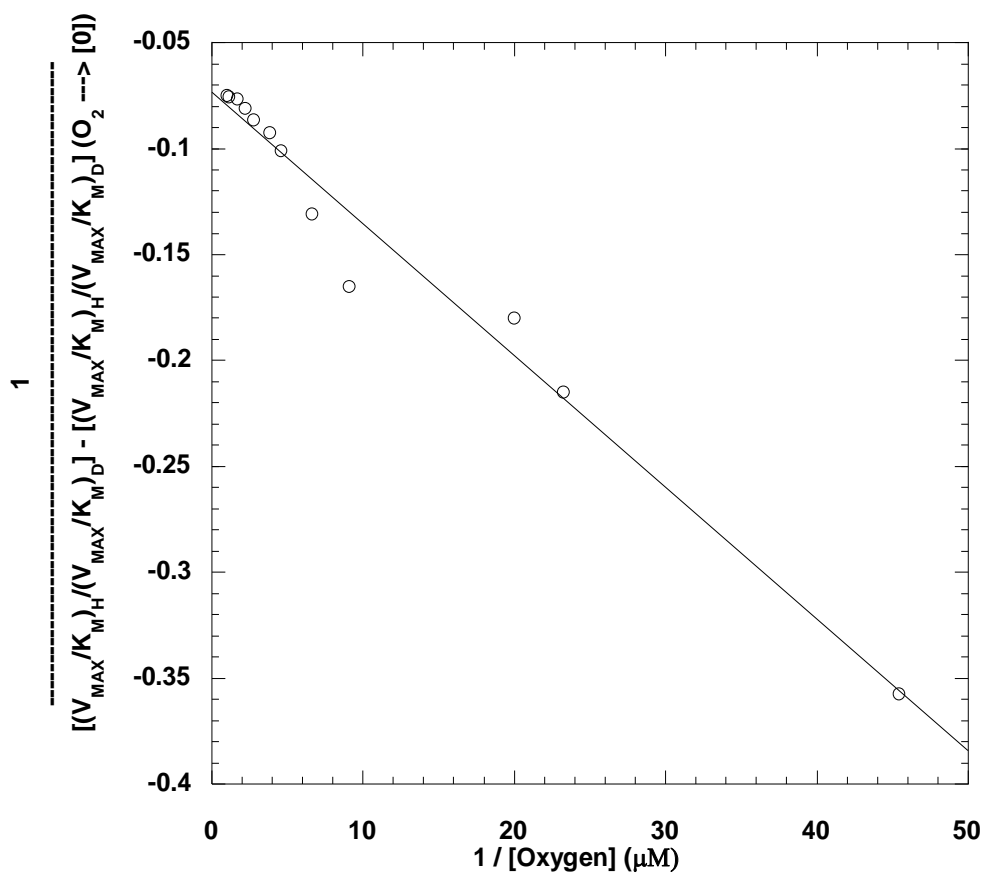

Figure E.

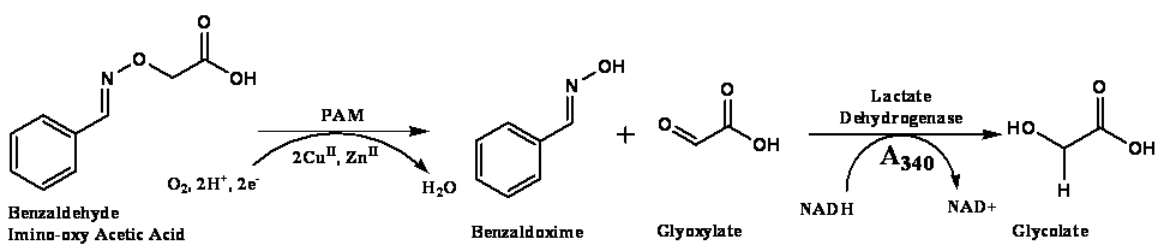

Scheme A.

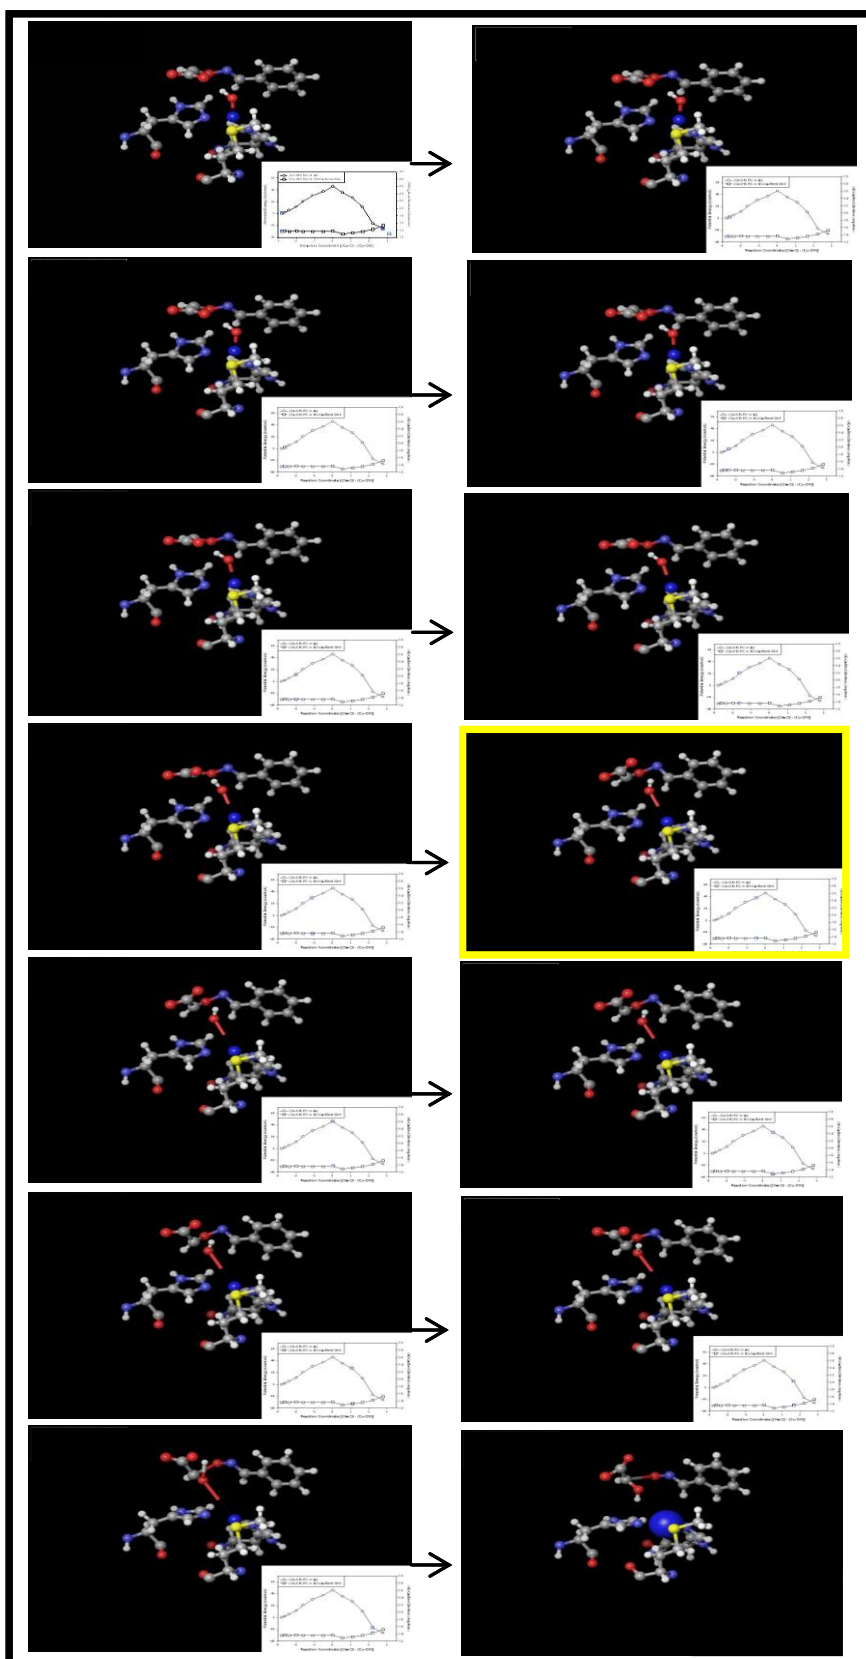

Scheme B.

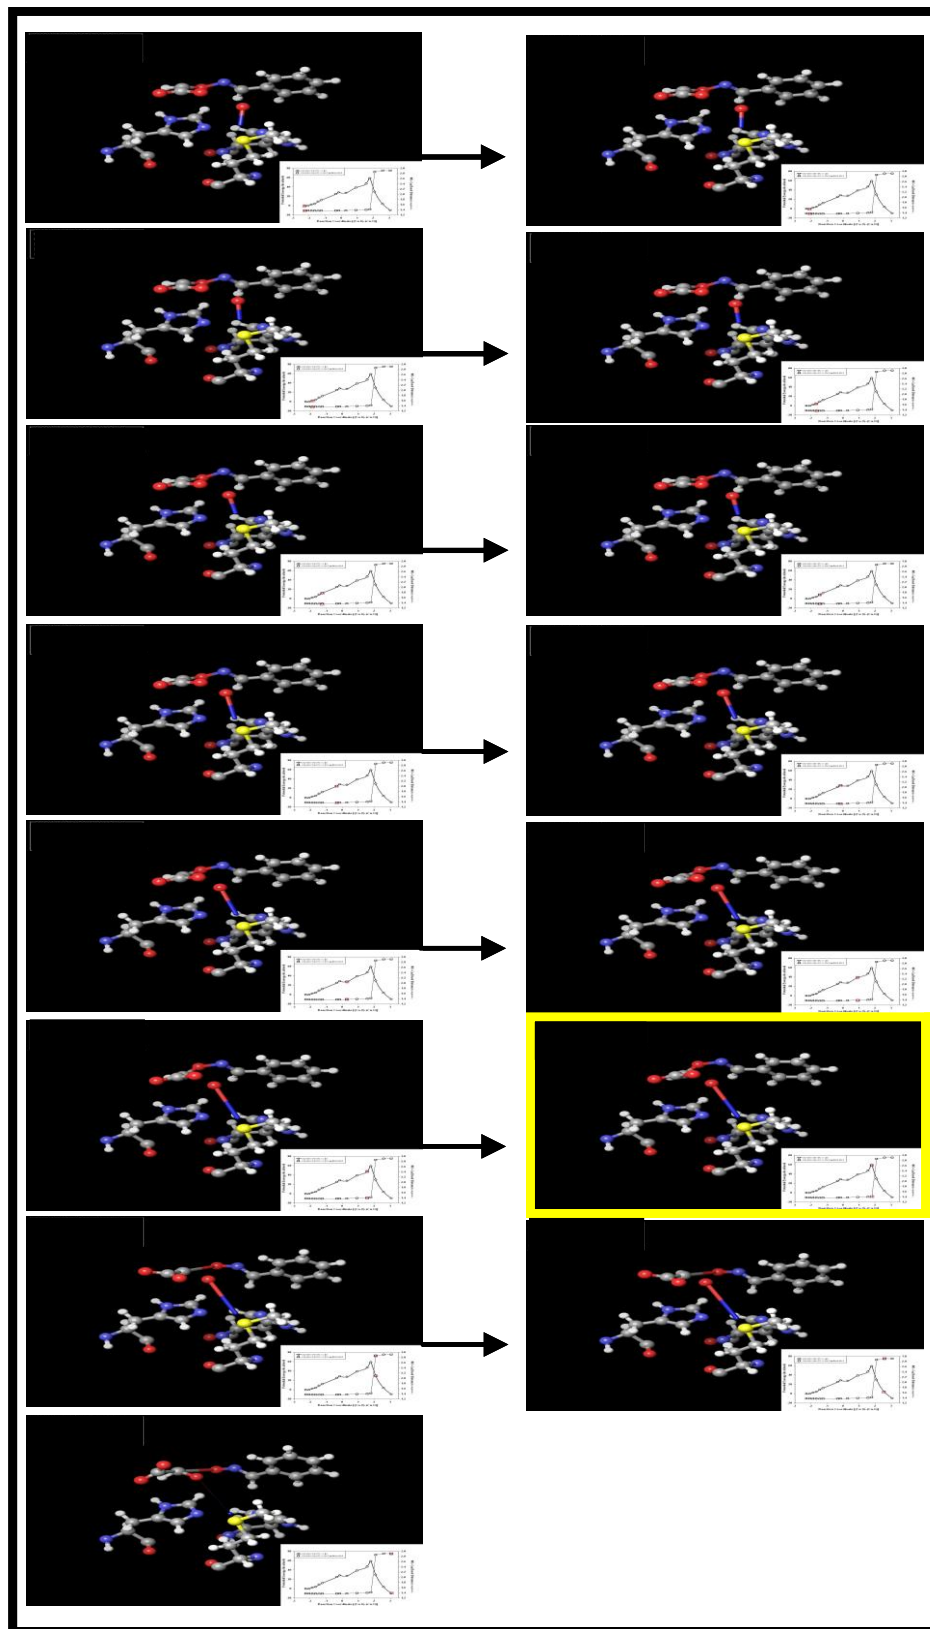

Scheme C.

| Protiated              |                                        |       |                        |       |                                                                        | Deuterated |                                        |       |                        |       |                                                                        |          |                                                  |       |
|------------------------|----------------------------------------|-------|------------------------|-------|------------------------------------------------------------------------|------------|----------------------------------------|-------|------------------------|-------|------------------------------------------------------------------------|----------|--------------------------------------------------|-------|
| [O <sub>2</sub> ] (μM) | (V <sub>MAX</sub> ) (s <sup>-1</sup> ) | error | (K <sub>M</sub> ) (μM) | error | (V <sub>MAX</sub> /K <sub>M</sub> ) (M <sup>-1</sup> s <sup>-1</sup> ) | error      | (V <sub>MAX</sub> ) (s <sup>-1</sup> ) | error | (K <sub>M</sub> ) (μM) | error | (V <sub>MAX</sub> /K <sub>M</sub> ) (M <sup>-1</sup> s <sup>-1</sup> ) | error    | <sup>0</sup> (V <sub>MAX</sub> /K <sub>M</sub> ) | error |
| 22                     | 1.16                                   | 0.05  | 2500                   | 214   | 4.62E+02                                                               | 4.37E+01   | 0.12                                   | 0.00  | 3349                   | 211   | 3.70E+01                                                               | 2.48E+00 | 12.5                                             | 1.4   |
| 43                     | 1.56                                   | 0.05  | 1200                   | 92    | 1.30E+03                                                               | 1.10E+02   | 0.42                                   | 0.02  | 3211                   | 329   | 1.29E+02                                                               | 1.43E+01 | 10.0                                             | 1.4   |
| 50                     | 1.94                                   | 0.10  | 789                    | 100   | 2.46E+03                                                               | 3.34E+02   | 0.53                                   | 0.03  | 1989                   | 323   | 2.68E+02                                                               | 4.53E+01 | 9.2                                              | 2.0   |
| 110                    | 2.95                                   | 0.06  | 666                    | 38    | 4.42E+03                                                               | 2.69E+02   | 0.88                                   | 0.02  | 1690                   | 135   | 5.18E+02                                                               | 4.36E+01 | 8.5                                              | 0.9   |
| 217                    | 3.27                                   | 0.10  | 141                    | 14    | 2.33E+04                                                               | 2.35E+03   | 1.94                                   | 0.04  | 405                    | 23    | 4.79E+03                                                               | 2.98E+02 | 4.9                                              | 0.6   |
| 450                    | 3.82                                   | 0.14  | 107                    | 13    | 3.59E+04                                                               | 4.54E+03   | 2.37                                   | 0.08  | 149                    | 23    | 1.59E+04                                                               | 2.57E+03 | 2.3                                              | 0.5   |
| 965                    | 4.25                                   | 0.24  | 77                     | 19    | 5.50E+04                                                               | 1.37E+04   | 3.25                                   | 0.05  | 74                     | 5     | 4.37E+04                                                               | 2.94E+03 | 1.3                                              | 0.3   |

Single Point (V<sub>MAX</sub>/K<sub>M</sub>)

| Protiated              |                         |       |          |                                                                        | Deuterated |                         |       |          |                                                                        |          |                                                  |       |
|------------------------|-------------------------|-------|----------|------------------------------------------------------------------------|------------|-------------------------|-------|----------|------------------------------------------------------------------------|----------|--------------------------------------------------|-------|
| [O <sub>2</sub> ] (μM) | Rate (s <sup>-1</sup> ) | SE    | [S] (μM) | (V <sub>MAX</sub> /K <sub>M</sub> ) (M <sup>-1</sup> s <sup>-1</sup> ) | error      | Rate (s <sup>-1</sup> ) | error | [S] (μM) | (V <sub>MAX</sub> /K <sub>M</sub> ) (M <sup>-1</sup> s <sup>-1</sup> ) | error    | <sup>0</sup> (V <sub>MAX</sub> /K <sub>M</sub> ) | error |
| 160                    | 0.205                   | 0.001 | 20       | 1.03E+04                                                               | 5.66E+01   | 0.0977478               | 0.016 | 75       | 1.46E+03                                                               | 2.10E+02 | 7.0                                              | 1.1   |
| 260                    | 0.456                   | 0.003 | 20       | 2.27E+04                                                               | 1.73E+02   | 0.2378863               | 0.045 | 35       | 5.90E+03                                                               | 1.28E+03 | 3.8                                              | 0.8   |
| 360                    | 0.632                   | 0.002 | 20       | 3.15E+04                                                               | 1.02E+02   | 0.3873916               | 0.046 | 35       | 1.01E+04                                                               | 1.31E+03 | 3.1                                              | 0.4   |
| 595                    | 0.858                   | 0.044 | 15       | 5.93E+04                                                               | 2.91E+03   | 0.5401725               | 0.018 | 15       | 3.69E+04                                                               | 1.19E+03 | 1.6                                              | 0.1   |
| 865                    | 1.364                   | 0.042 | 15       | 9.29E+04                                                               | 2.79E+03   | 0.9763579               | 0.002 | 15       | 6.50E+04                                                               | 1.15E+02 | 1.4                                              | 0.0   |

Table A.

| [Substrate] (μM) | Protiated                           |      |                     |       |                                                  | Deuterated |                                     |      |                     |        | Isotope Effect                                   |          |                                                  |      |
|------------------|-------------------------------------|------|---------------------|-------|--------------------------------------------------|------------|-------------------------------------|------|---------------------|--------|--------------------------------------------------|----------|--------------------------------------------------|------|
|                  | V <sub>MAX</sub> (s <sup>-1</sup> ) | SE   | K <sub>M</sub> (mM) | SE    | (V <sub>MAX</sub> /K <sub>M</sub> ) <sub>H</sub> | SE         | V <sub>MAX</sub> (s <sup>-1</sup> ) | SE   | K <sub>M</sub> (mM) | SE     | (V <sub>MAX</sub> /K <sub>M</sub> ) <sub>D</sub> | SE       | <sup>0</sup> (V <sub>MAX</sub> /K <sub>M</sub> ) | SE   |
| 600              | 3.58                                | 0.16 | 204.89              | 24.62 | 1.75E+04                                         | 2.24E+03   | 5.88                                | 0.89 | 1659.80             | 330.69 | 3.54E+03                                         | 8.87E+02 | 4.94                                             | 1.39 |
| 800              | 4.15                                | 0.15 | 212.40              | 20.29 | 1.95E+04                                         | 2.00E+03   | 4.71                                | 0.86 | 1015.20             | 270.93 | 4.64E+03                                         | 1.50E+03 | 4.21                                             | 1.43 |
| 1900             | 4.03                                | 0.14 | 122.47              | 11.26 | 3.29E+04                                         | 3.23E+03   | 3.93                                | 0.25 | 653.02              | 73.72  | 6.02E+03                                         | 7.84E+02 | 5.47                                             | 0.89 |
| 3000             | 4.12                                | 0.14 | 140.42              | 11.91 | 2.93E+04                                         | 2.68E+03   | 3.90                                | 0.23 | 547.84              | 60.01  | 7.11E+03                                         | 8.87E+02 | 4.13                                             | 0.64 |

Table B.
